# Supplementary material for: Alkyl substituents introduced into novel d10-metalimidazole-4,5-dicarboxylate frameworks: synthesis, structure diversities and photoluminescence properties
Source: Royal Society of Chemistry journal article supplement (doi:10.1039/c2ce26063h), 2012-11-14
Supplement: c2ce26063h.pdf [file c2ce26063h.pdf]

## Supplementary Information for:

# Alkyl Substituents Introduced Novel $d^{10}$ -Metal–Imidazole-4,5-Dicarboxylate Frameworks: Synthesis, Structure Diversities and Photoluminescence Properties

Quan-Guo Zhai\*, Rong-Rong Zeng, Shu-Ni Li, Yu-Cheng Jiang, Man-Cheng Hu\*

*Key Laboratory of Macromolecular Science of Shaanxi Province*

*School of Chemistry and Chemical Engineering*

*Shaanxi Normal University*

*Xi'an, 710062, Shaanxi, P. R. China*

*Tel: +86-29-81530767*

*Fax: +86-29-81530727*

*\*Corresponding authors:*

*E-mail: [zhaiqg@snnu.edu.cn](mailto:zhaiqg@snnu.edu.cn) (Dr. Q. -G. Zhai)*

*[hmch@snnu.edu.cn](mailto:hmch@snnu.edu.cn) (Prof. M. -C. Hu)*

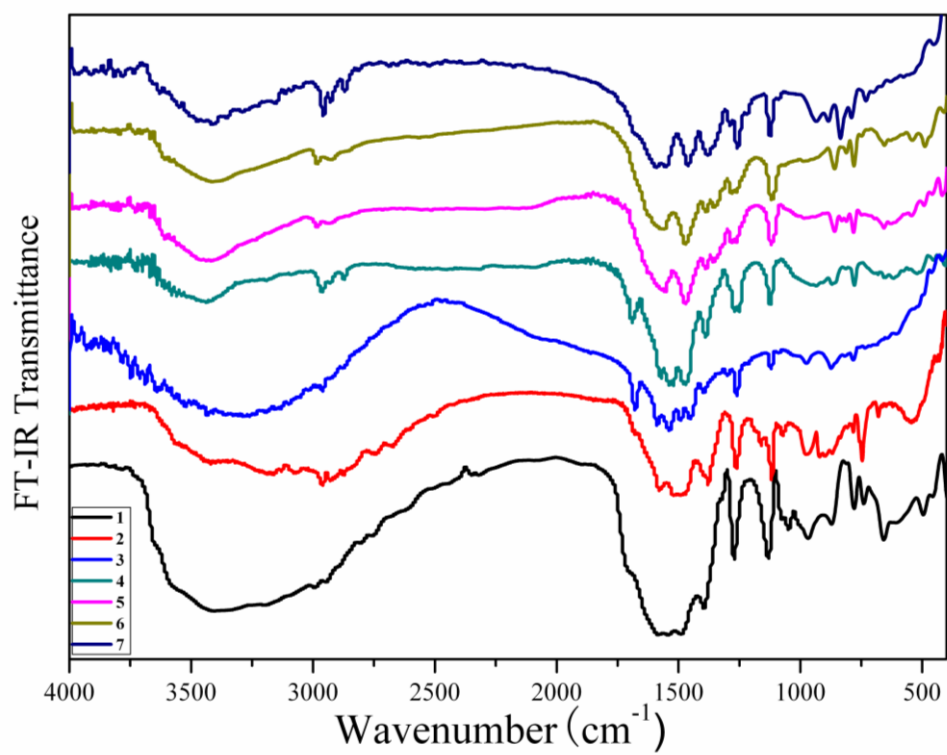

**Figure S1.** FT-IR spectra of complexes 1-7.

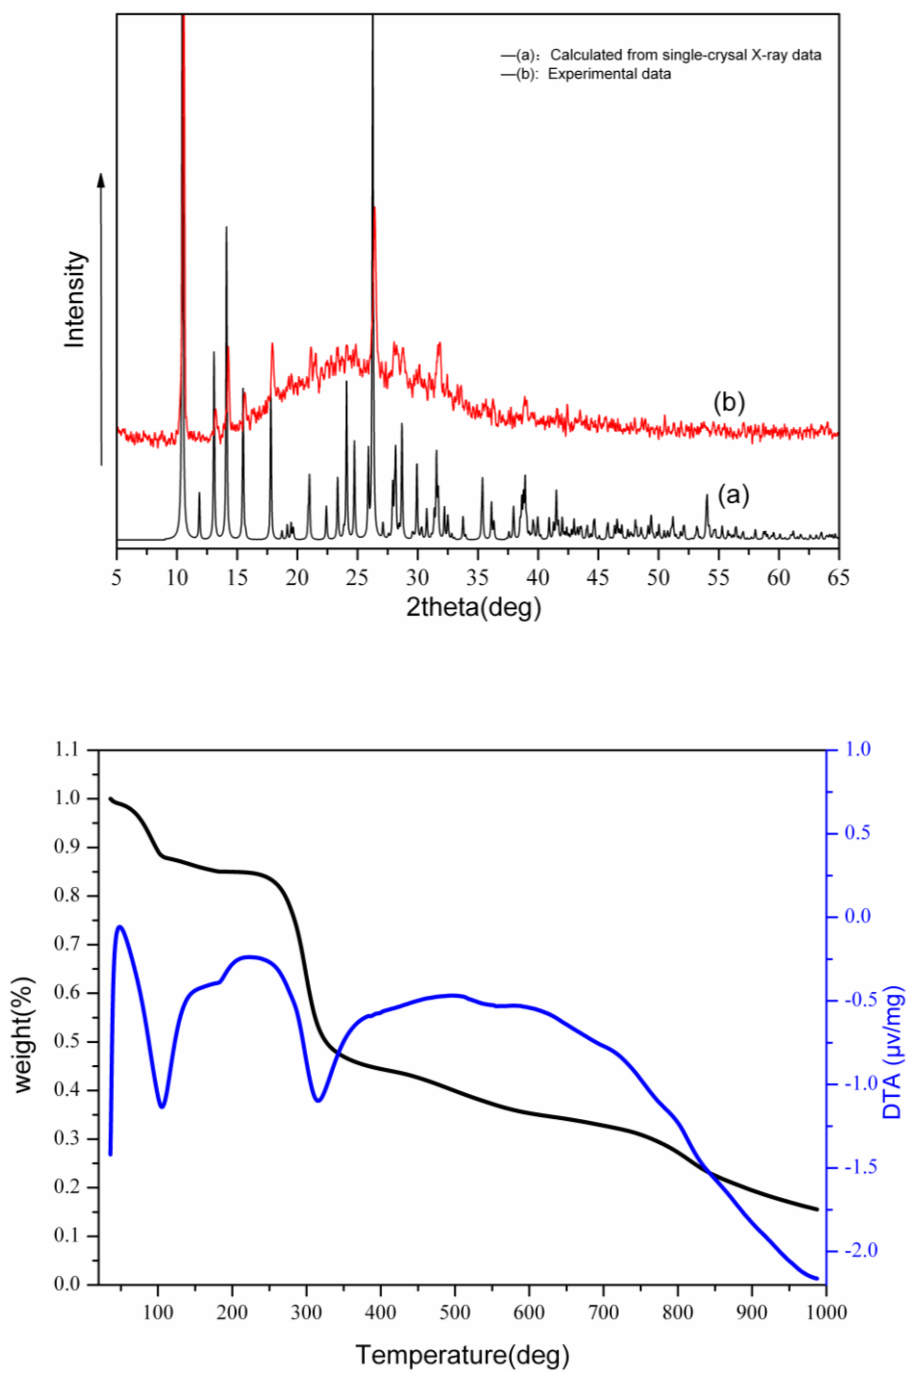

**Figure S2.** XRPD (top) and TG (black)/DTA (blue) (bottom) curves for **1**.

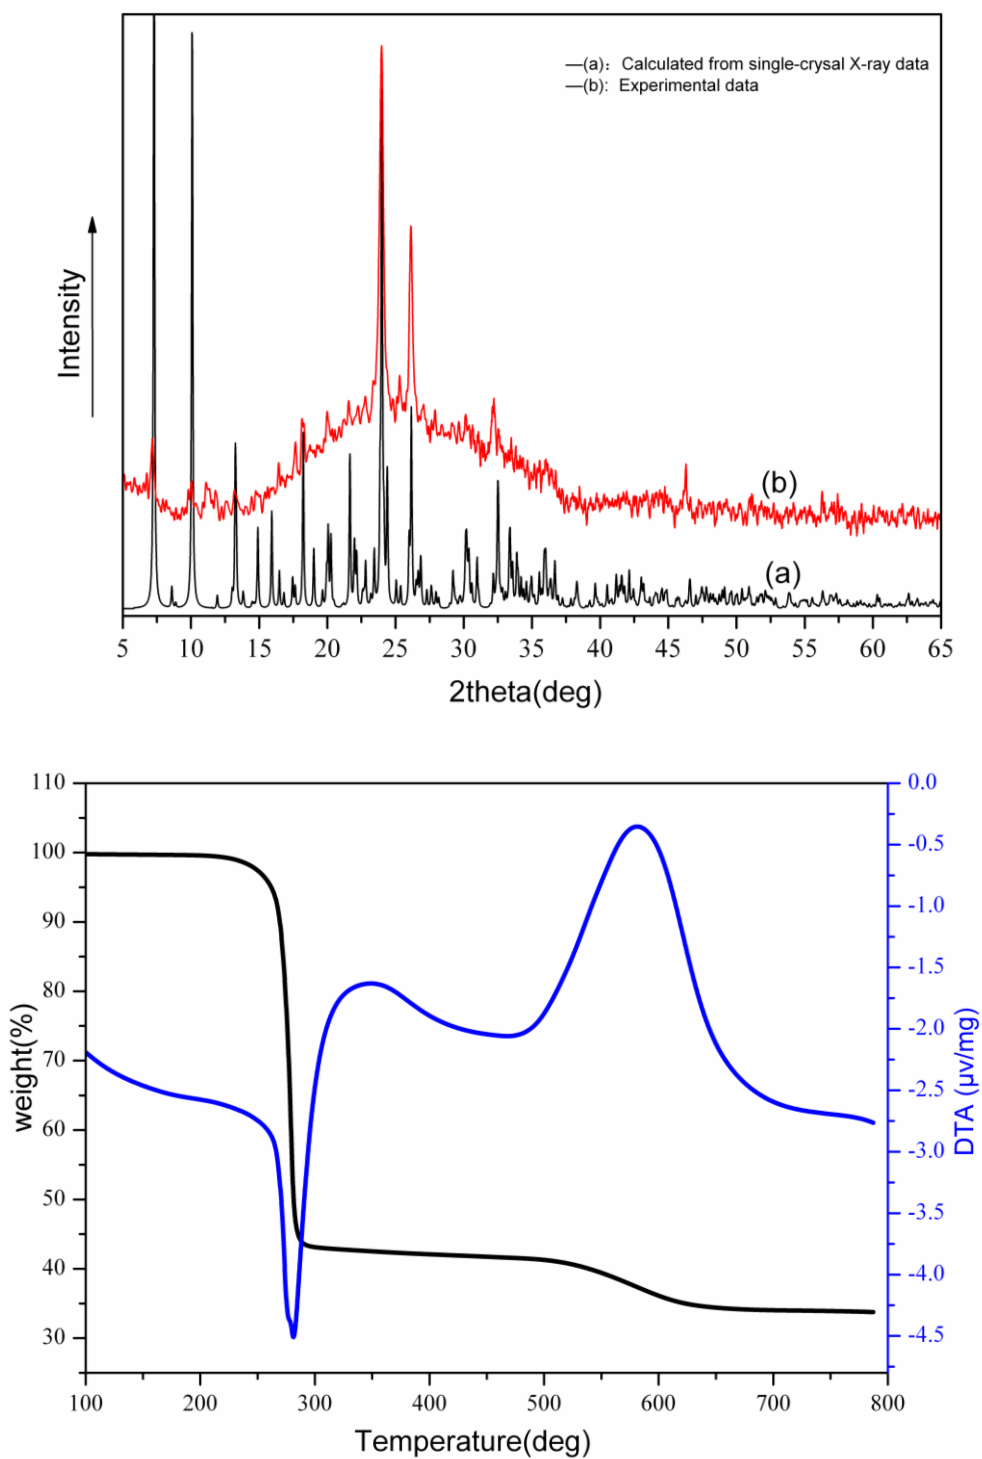

**Figure S3.** XRPD (top) and TG (black)/DTA (blue) (bottom) curves for **2**.

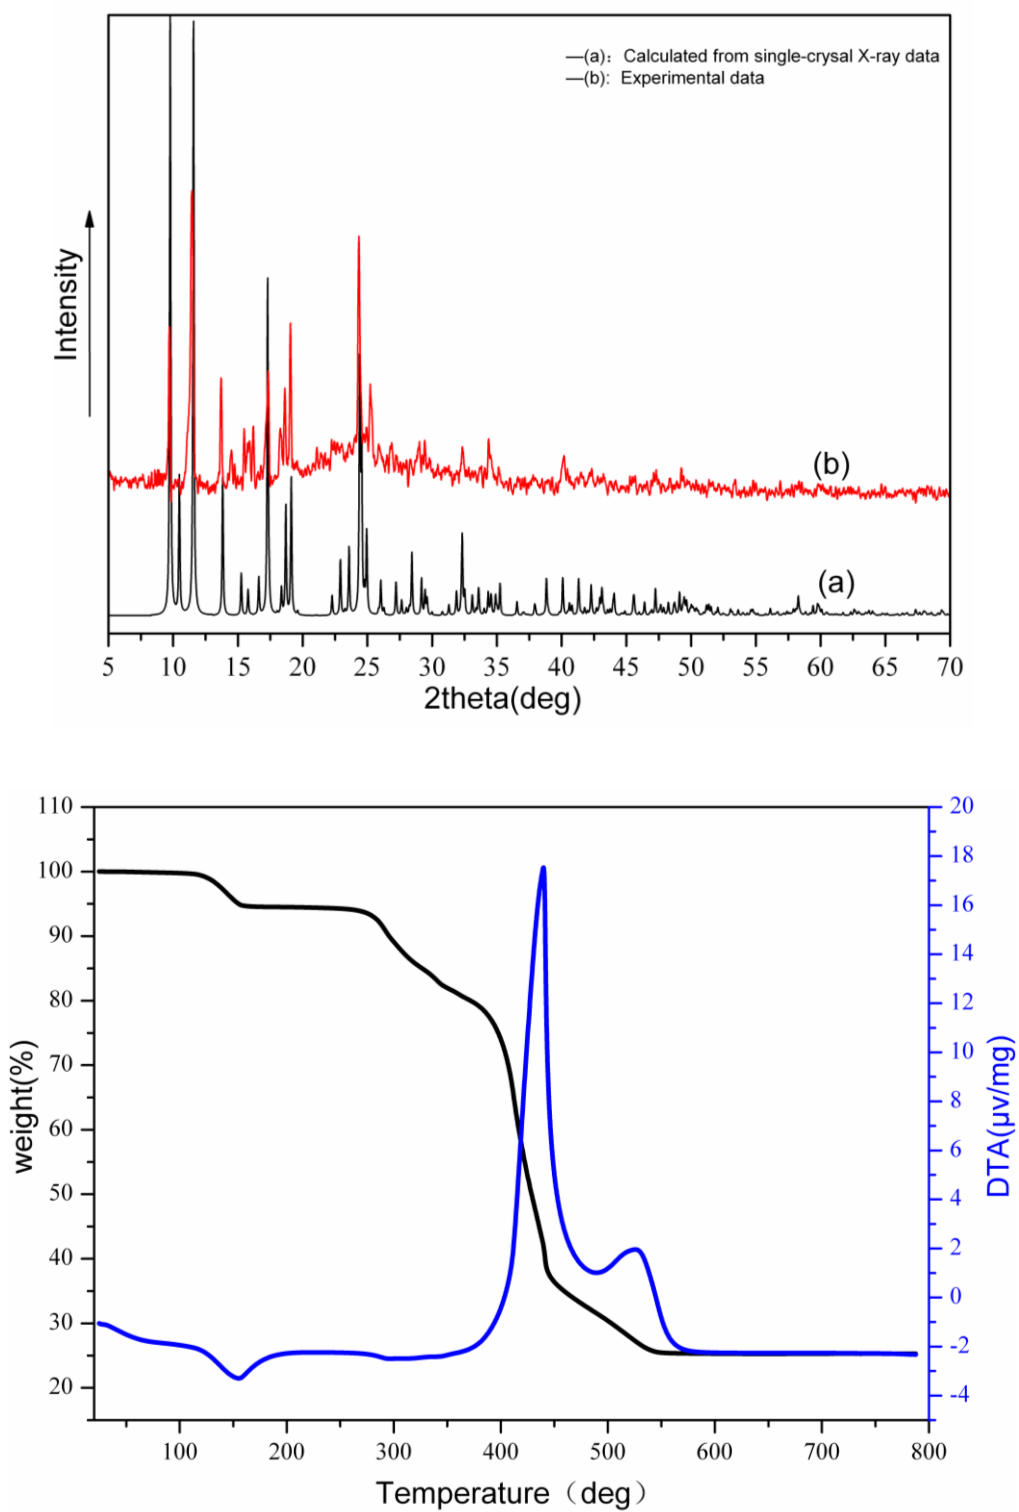

**Figure S4.** XRPD (top) and TG (black)/DTA (blue) (bottom) curves for **3**.

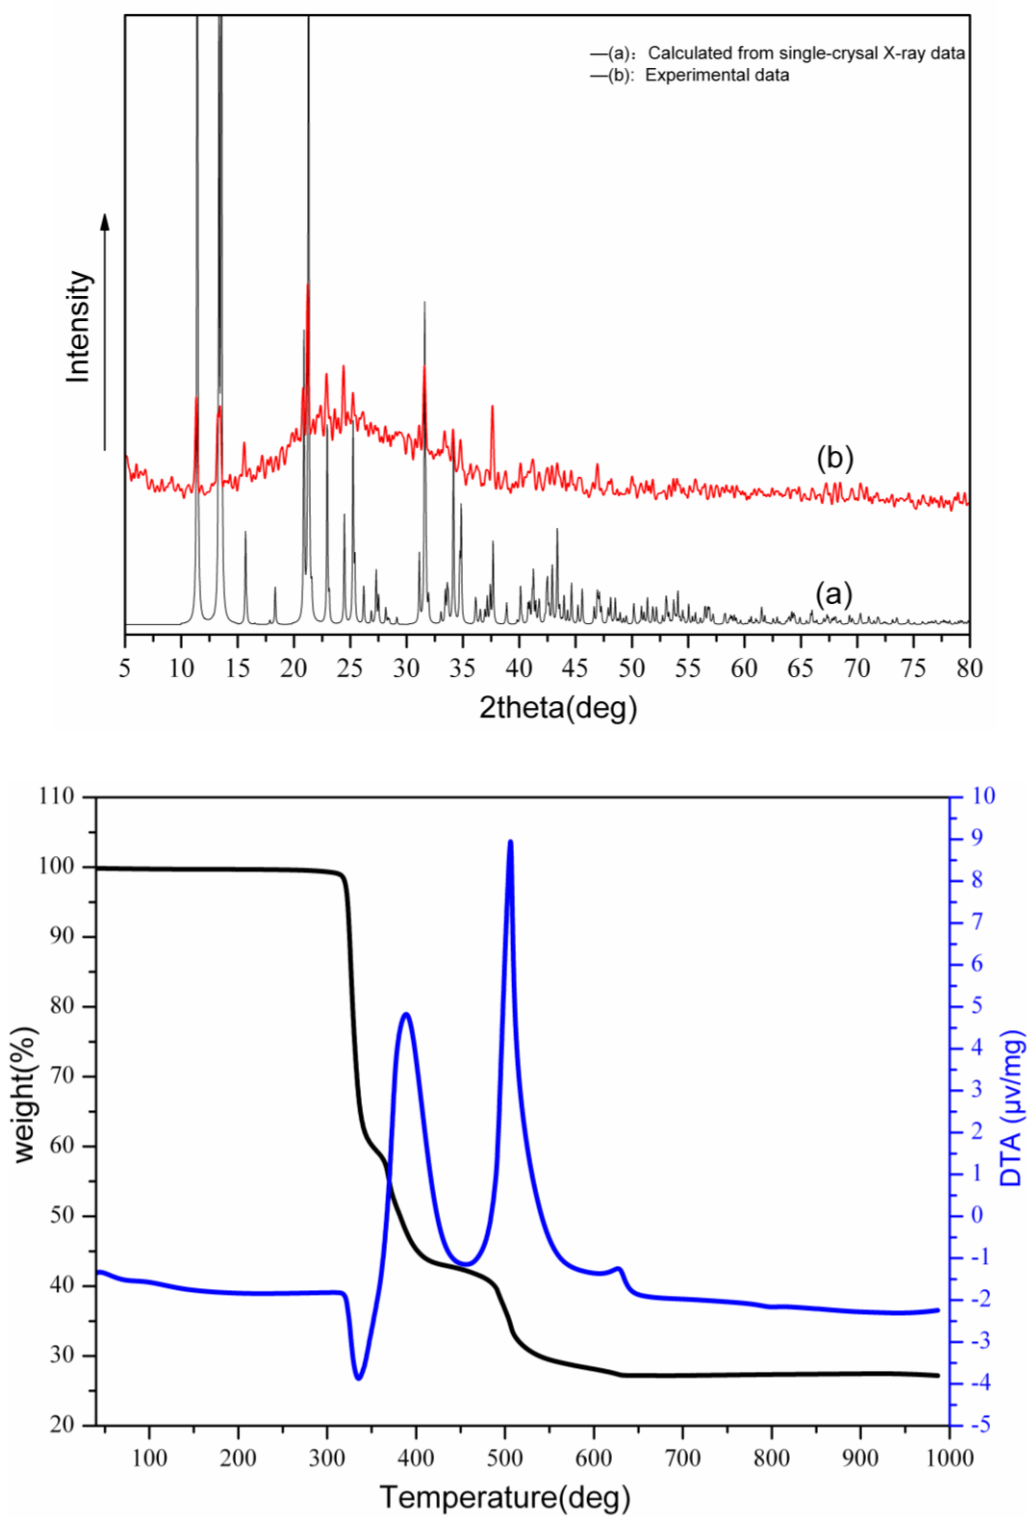

**Figure S5.** XRPD (top) and TG (black)/DTA (blue) (bottom) curves for **4**.

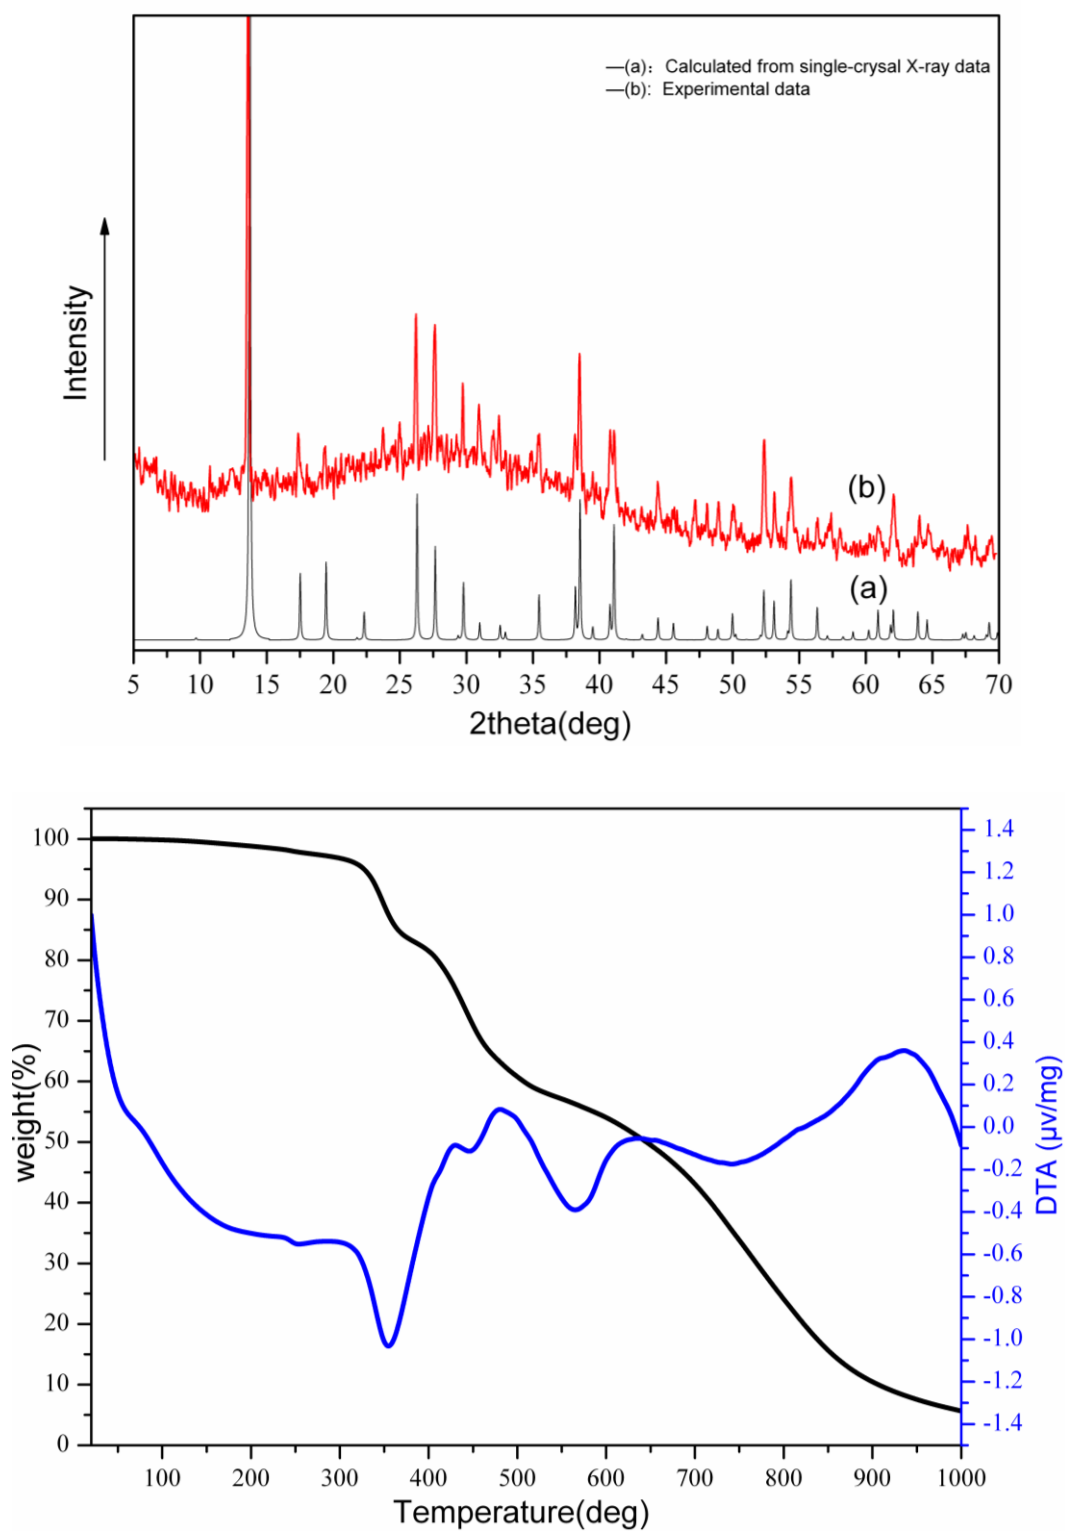

**Figure S6.** XRPD (top) and TG (black)/DTA (blue) (bottom) curves for **5**.

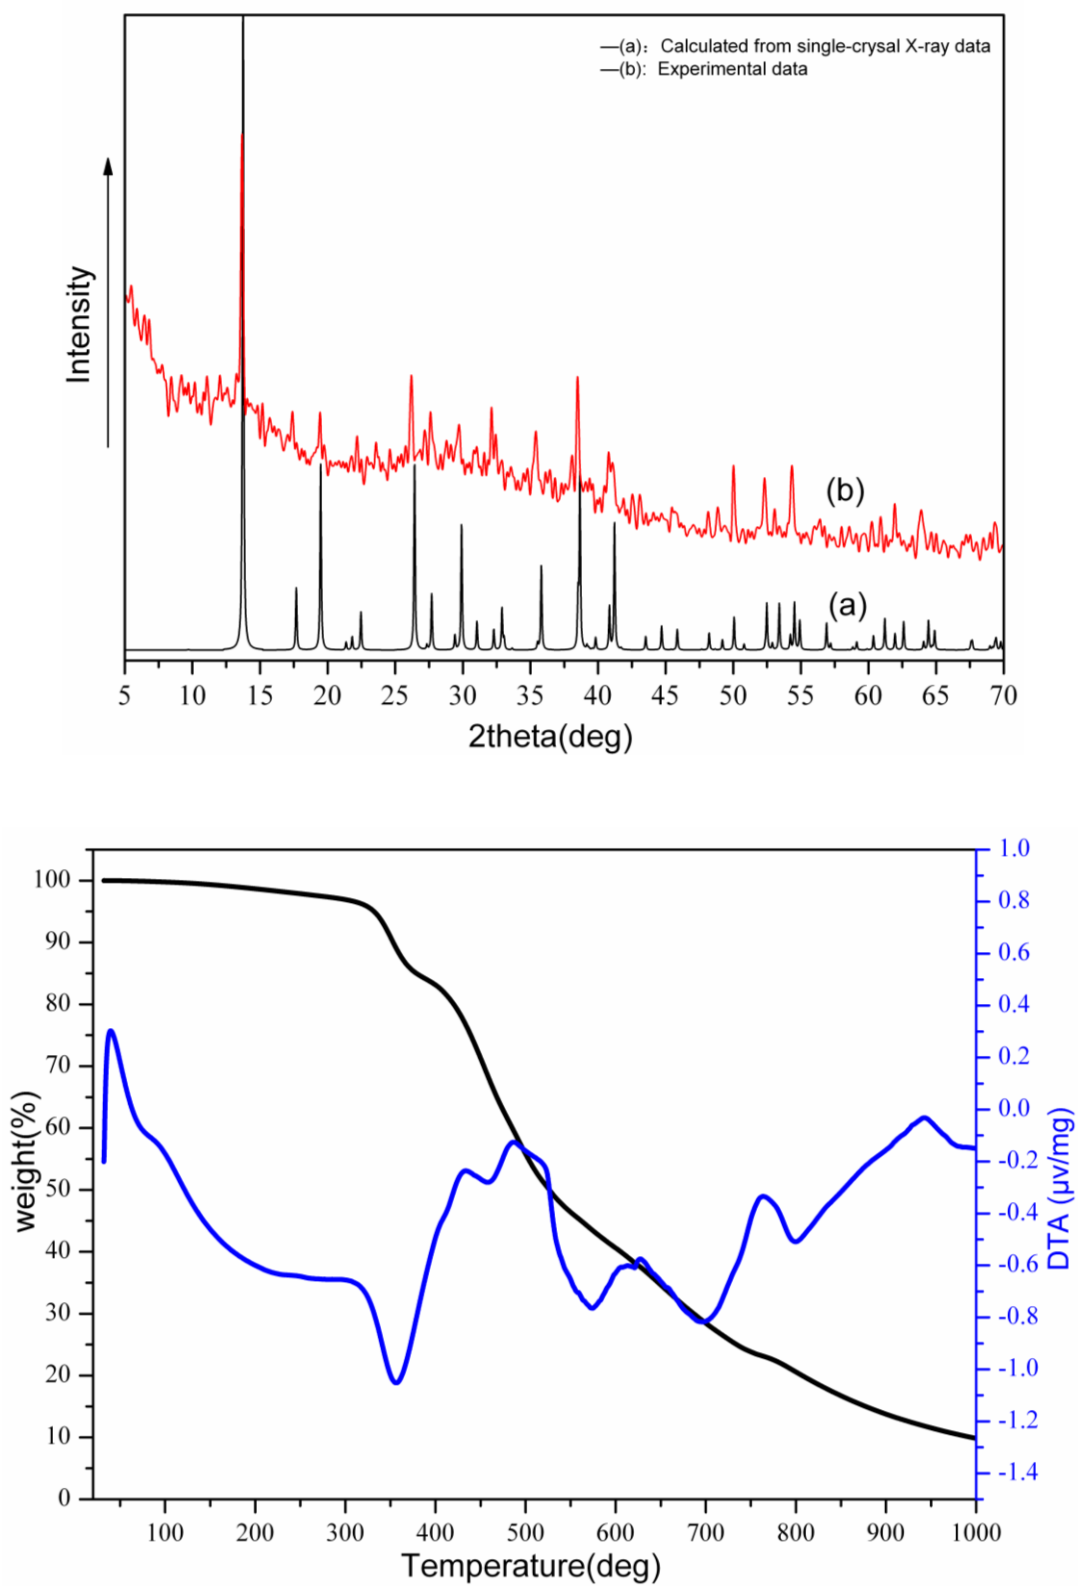

**Figure S7.** XRPD (top) and TG (black)/DTA (blue) (bottom) curves for **6**.



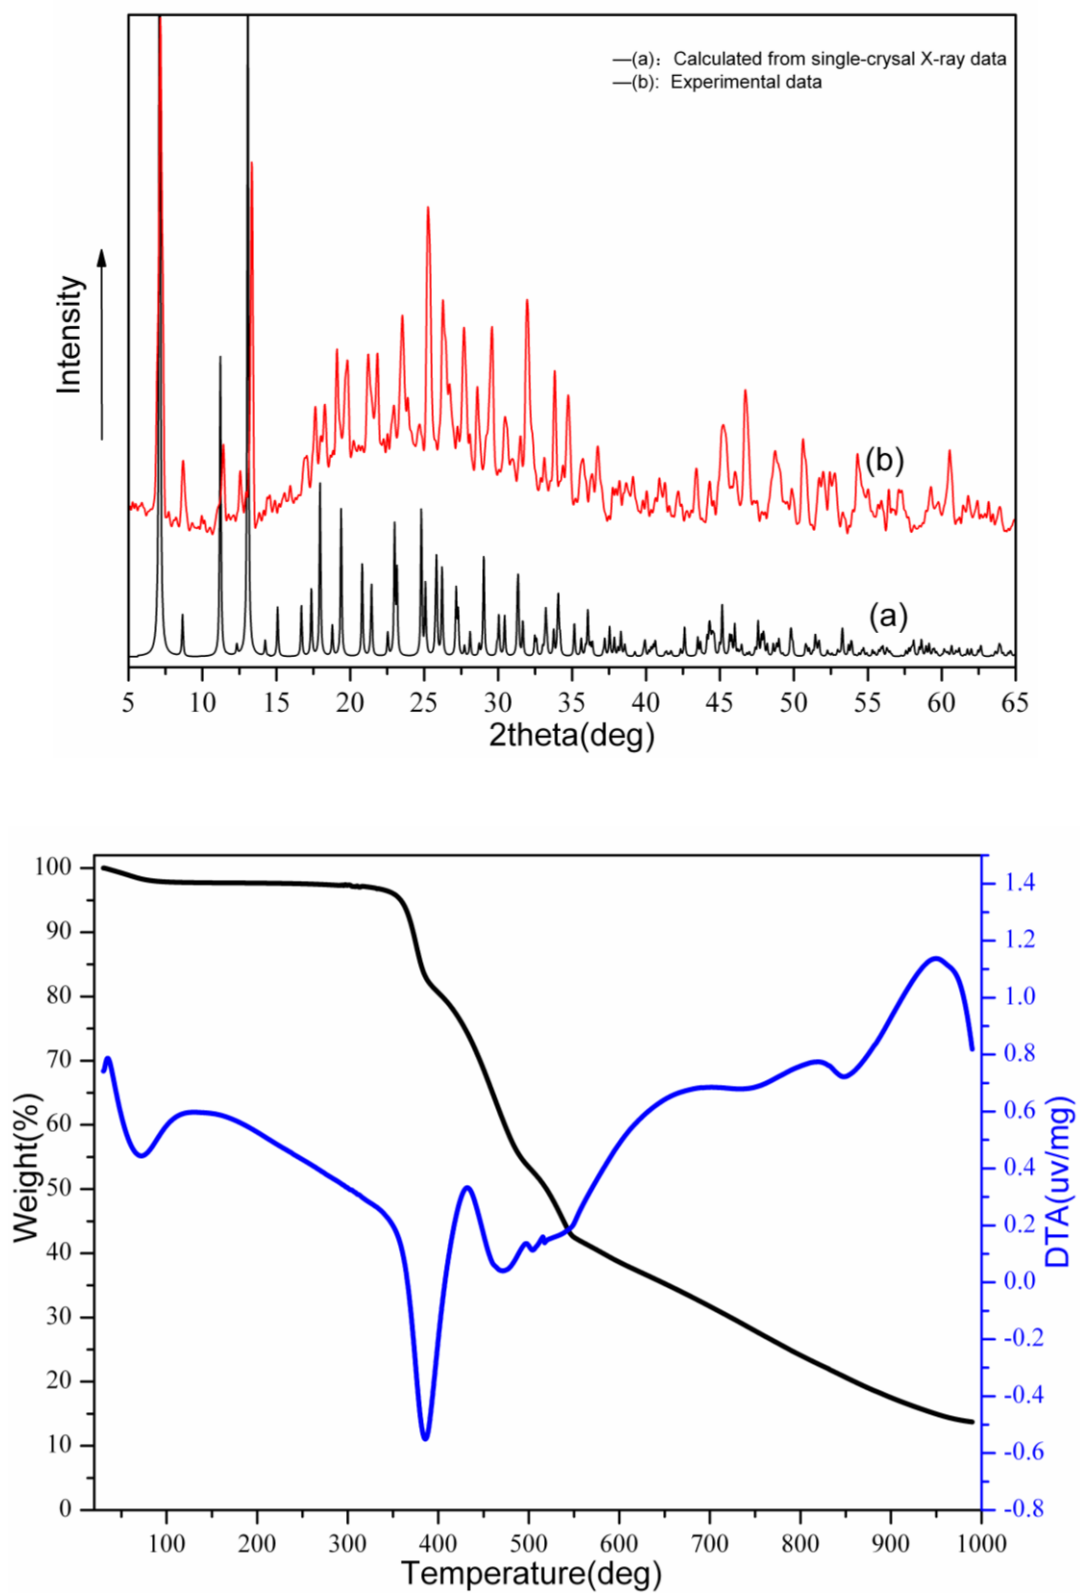

**Figure S8.** XRPD (top) and TG (black)/DTA (blue) (bottom) curves for **7**.

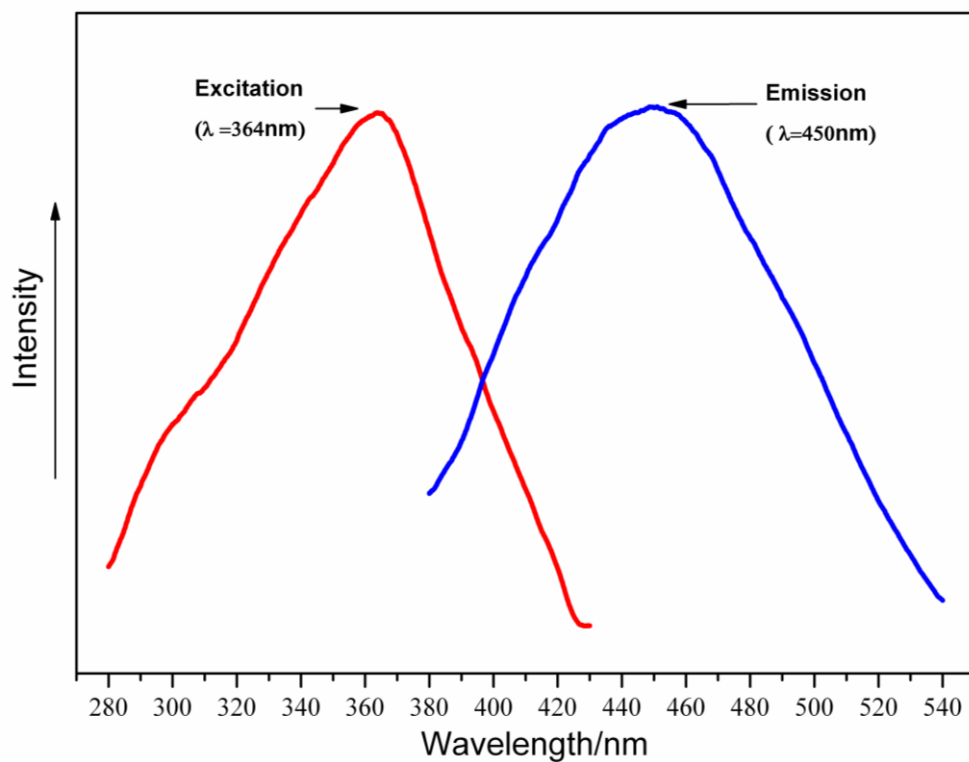

**Figure S9.** Solid state emission spectra of **H<sub>3</sub>MIMDC** at ambient temperature.

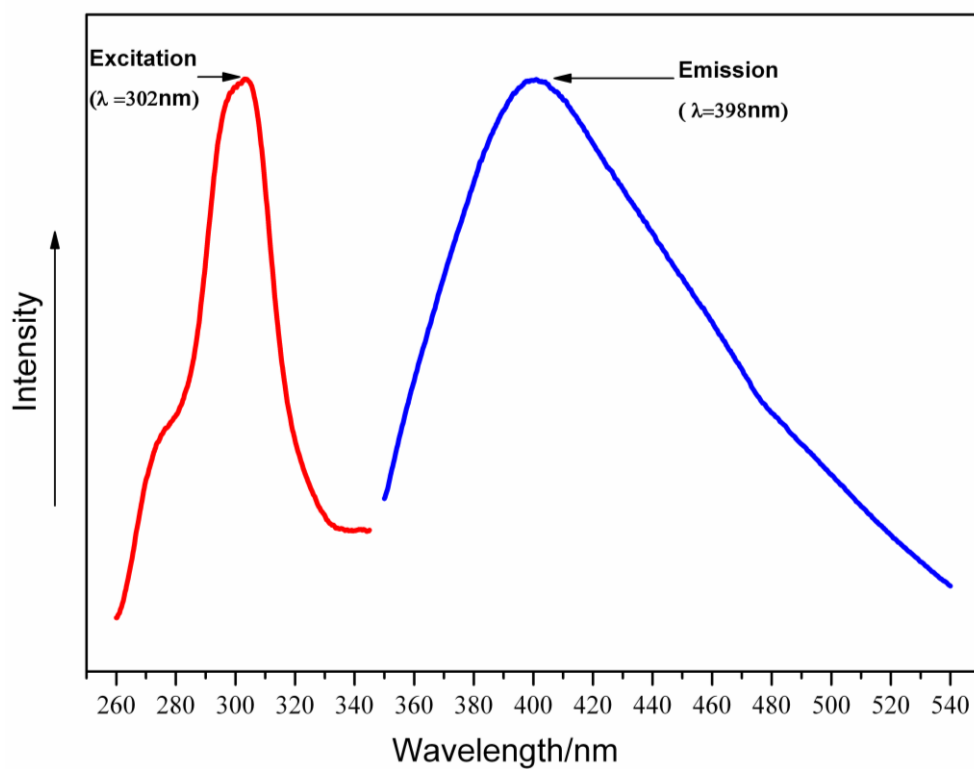

**Figure S10.** Solid state emission spectra of **H<sub>3</sub>EIMDC** at ambient temperature.

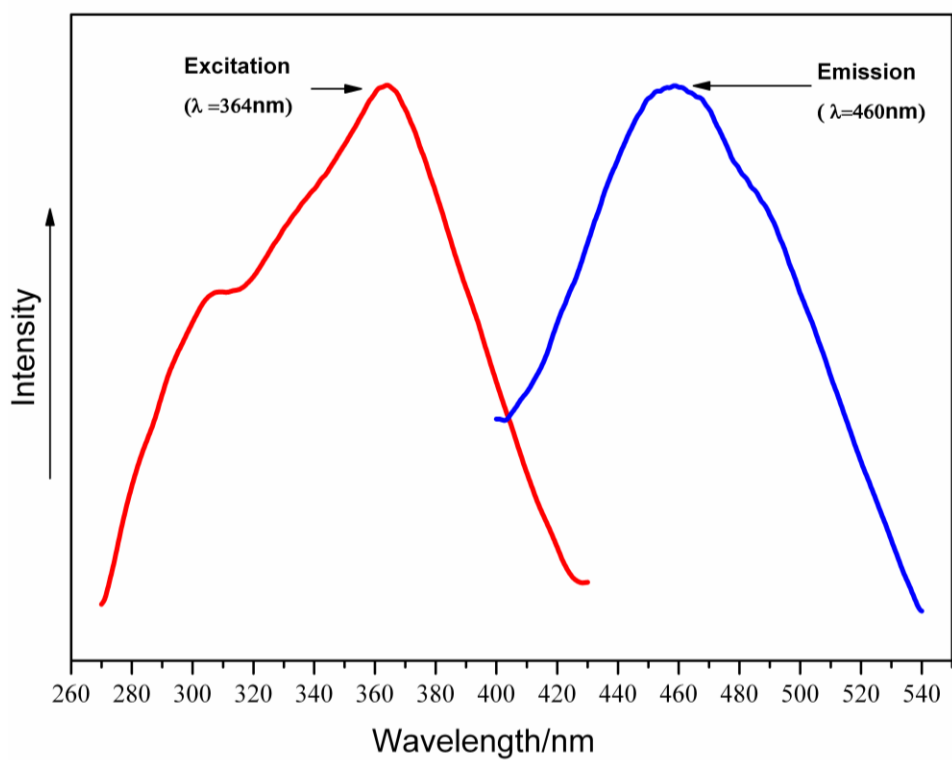

**Figure S11.** Solid state emission spectra of **H<sub>3</sub>PIMDC** at ambient temperature.

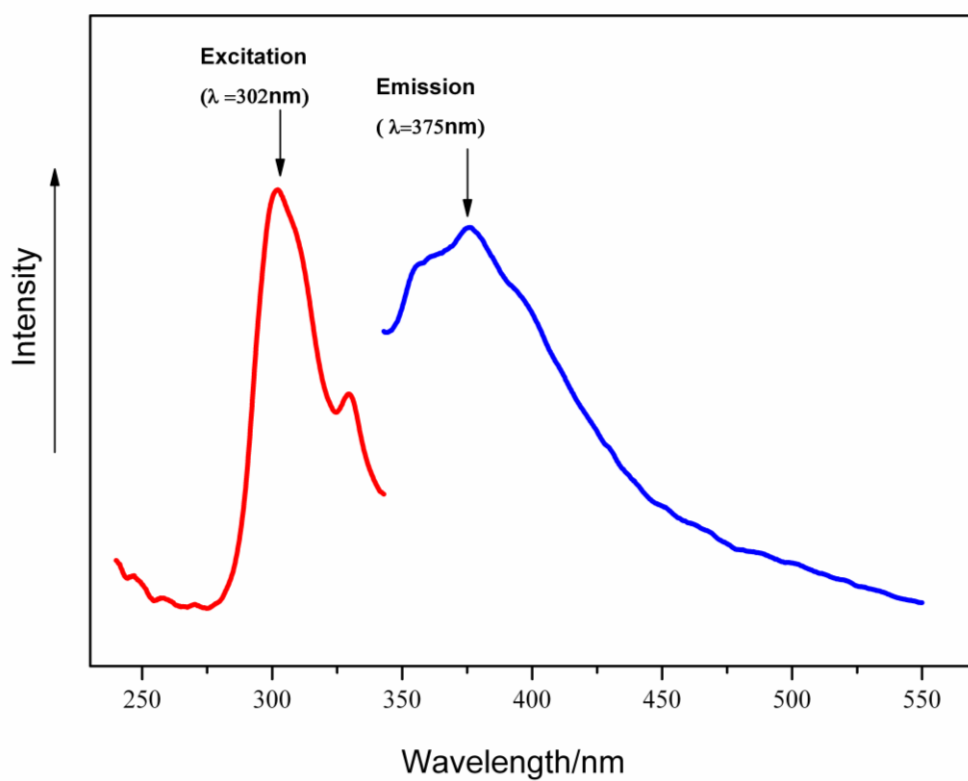

**Figure S12.** Solid state emission spectra of **1** at ambient temperature.

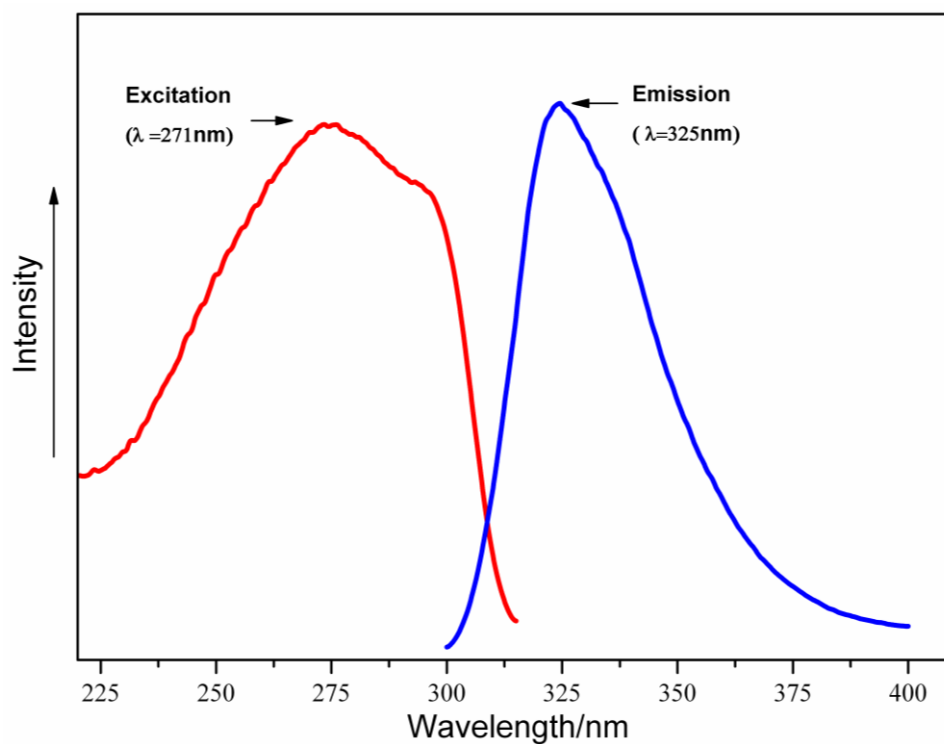

**Figure S13.** Solid state emission spectra of **3** at ambient temperature.

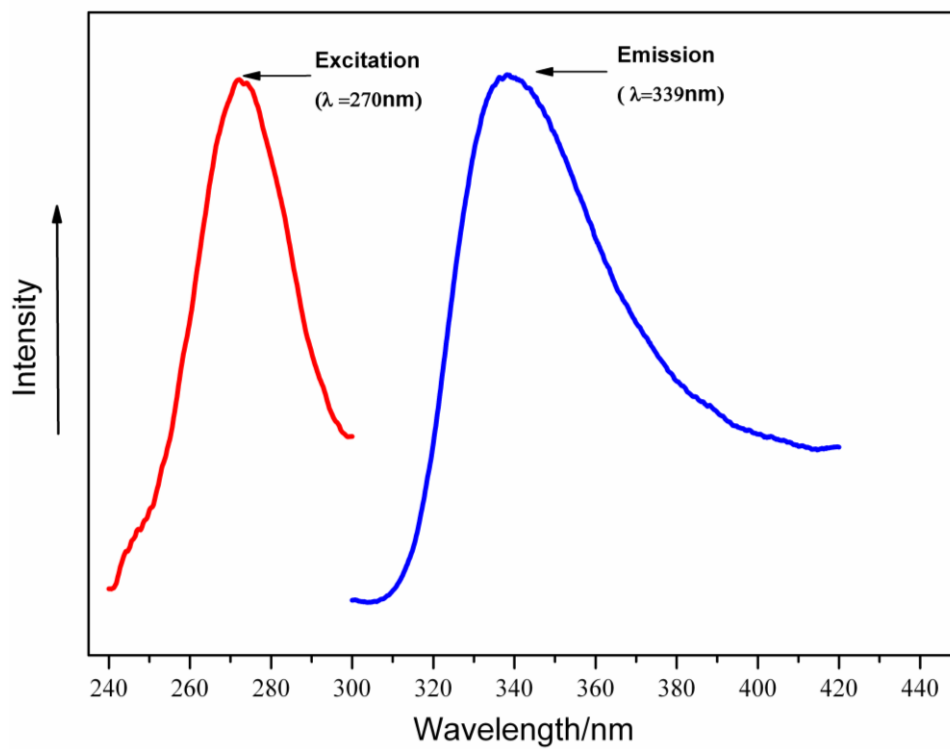

**Figure S14.** Solid state emission spectra of **5** at ambient temperature.

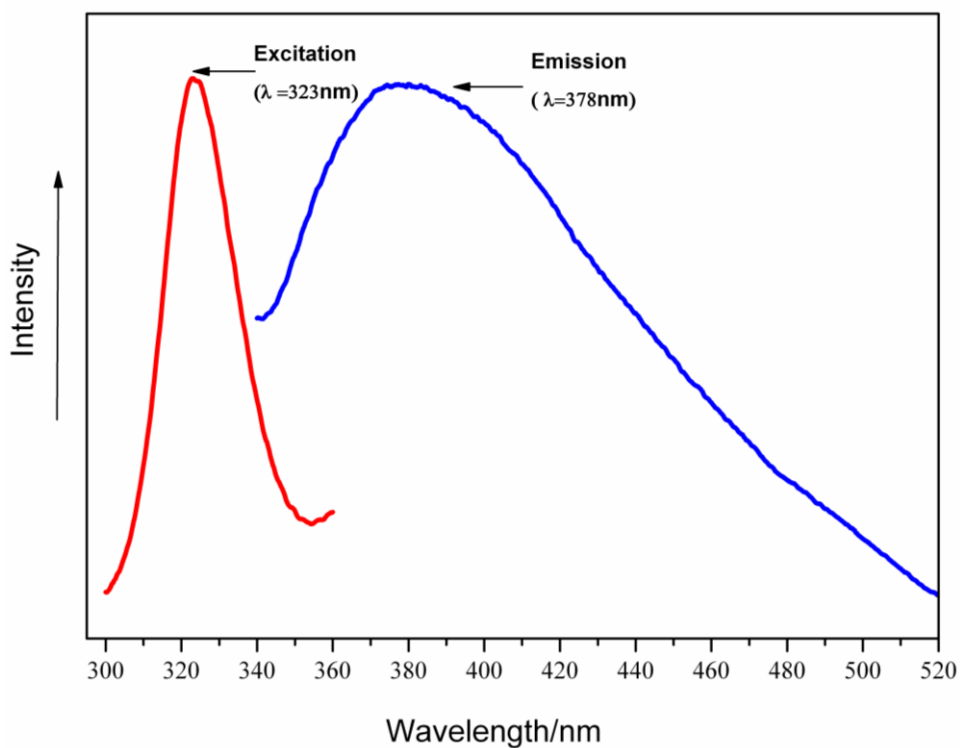

**Figure S15.** Solid state emission spectra of **6** at ambient temperature.

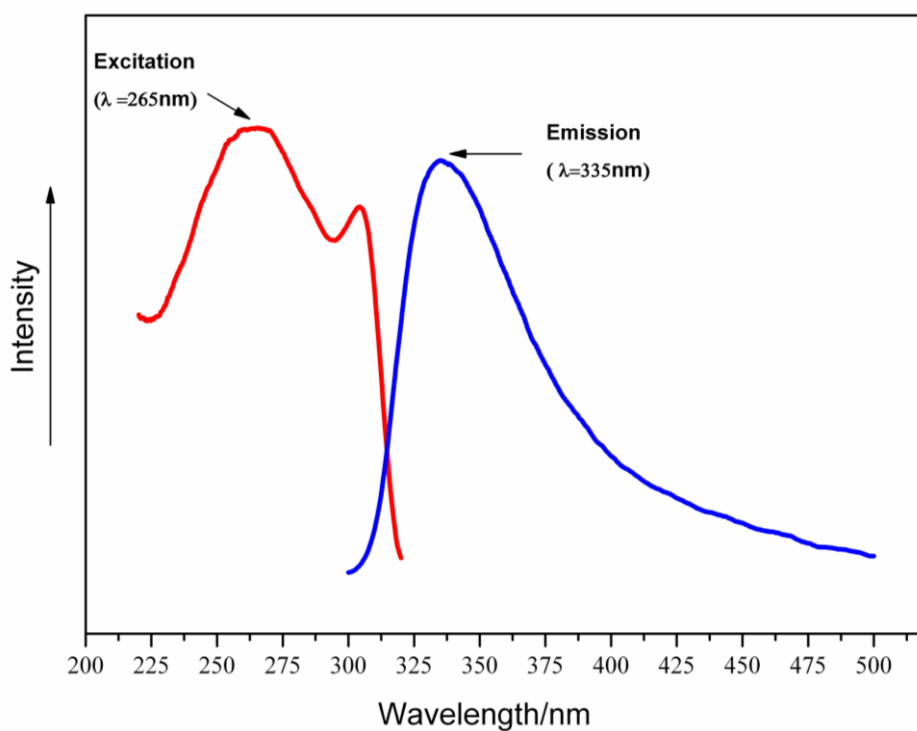

**Figure S16.** Solid state emission spectra of **7** at ambient temperature.
